# Supplementary material
Source: MDPI journal article supplement (https://www.mdpi.com/2673-9879/3/2/22)
Supplement: s1 [file s1 › futurepharmacol-2239815-supplementary.pdf]

# Supplementary Materials: Synthetic Curcumin Analogues Present Antiflavivirus Activity In Vitro with Potential Multiflavivirus Activity from a Thiazolyldhydrazone Moiety

Mateus Sá Magalhães Serafim, Thales Kronenberger, Renata Barbosa de Oliveira, Erna Geessien Kroon, Jônatas Santos Abrahão, Bruno Eduardo Fernandes Mota and Vinícius Gonçalves Maltarollo

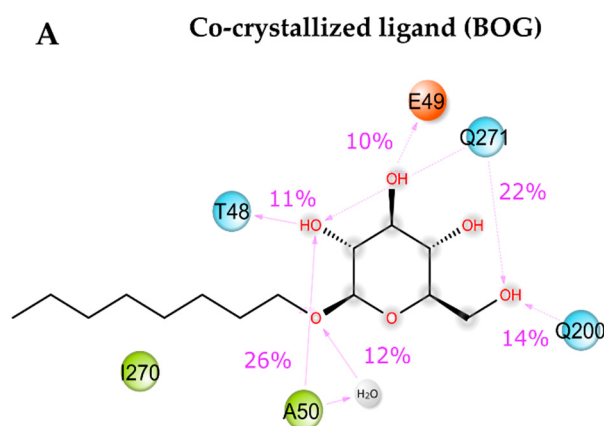

**Figure S1.** Summary of the interactions along the MD simulations. **(A)** Co-crystallized *n*-octyl-beta-D-glucoside (BOG) retrieved from the PDB 1OKE. Pink solid arrows represent interactions with main chain of the amino acids, while dashed pink arrows represent polar contacts with their side chains. Pi-pi interactions are represented by green arrows. The respective frequency of the observed interaction is depicted as a number above the arrow.
